# Supplementary material for: Long-lasting high-latitude volcanic eruptions as a trigger for sudden stratospheric warmings: An idealized model experiment
Source: Copernicus journal article supplement (doi:10.5194/egusphere-2024-1302), 2024-05-21
Supplement: Supplementary file 1 [file egusphere-2024-1302-supplement.pdf]

Supplementary Figure for the manuscript *Long-lasting high-latitude volcanic eruptions as a trigger for sudden stratospheric warmings: An idealized model experiment* by Guðlaugsdóttir, Peings, Zanchettin and Magnusdottir, submitted to Atmospheric Chemistry and Physics on the 10th of May 2024.

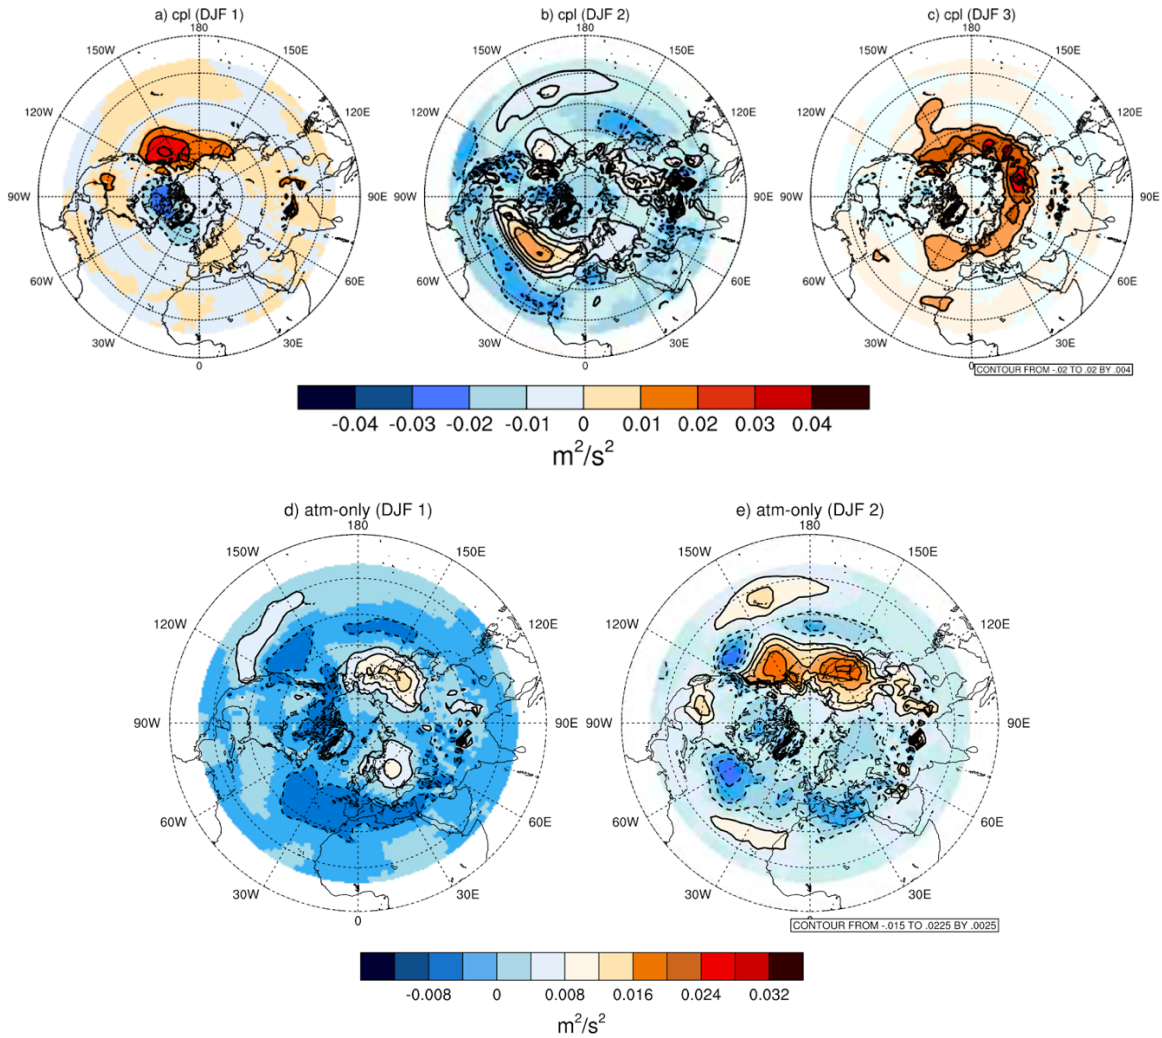

Supplementary Figure S1: a-c) Coupled and d-e) atm-only vertical wave activity flux (Plumb flux) at 150 hPa for winters 1-3 and 1-2, respectively. Contours indicate 95% significance according to a student's t-test.
